# Supplementary material
Source: publisher site journal article supplement (https://zookeys.pensoft.net/article/68316/download/suppl/32/)
Supplement: Supplementary file

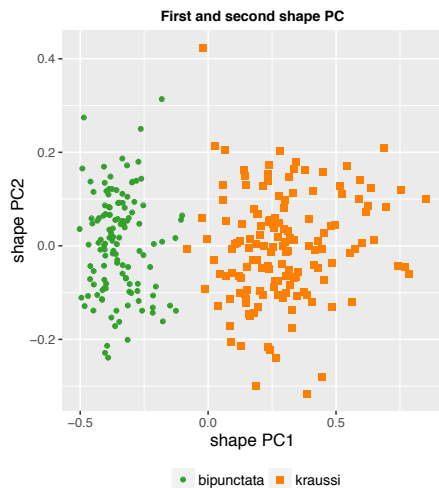

**A**

**PCA Ratio Spectrum for shape PC1**

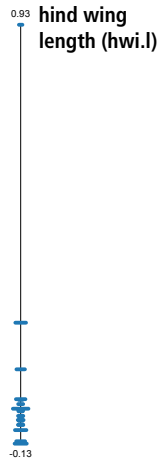

**B**

**PCA Ratio Spectrum for shape PC2**

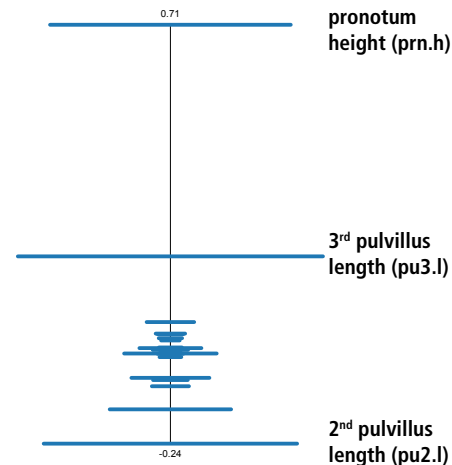

**C**

Supplementary Figure 1. Shape principal component analysis (shape PCA) of 273 females of *Tetrix bipunctata* and *kraussi*. **A:** analysis including 20 variables, scatterplot of first against second shape PC. **B:** PCA ratio spectrum for first shape PC. **C:** PCA ratio spectrum for second shape PC. Horizontal bars in the ratio spectra represent 68% bootstrap confidence intervals based on 1000 replicates.
